# Supplementary material
Source: PubMed Central journal article supplement (PMC3141934)
Supplement: 1100532108_pnas.201100532SI.pdf [file 1100532108_pnas.201100532SI.pdf]

# Supporting Information

Yang et al. 10.1073/pnas.1100532108

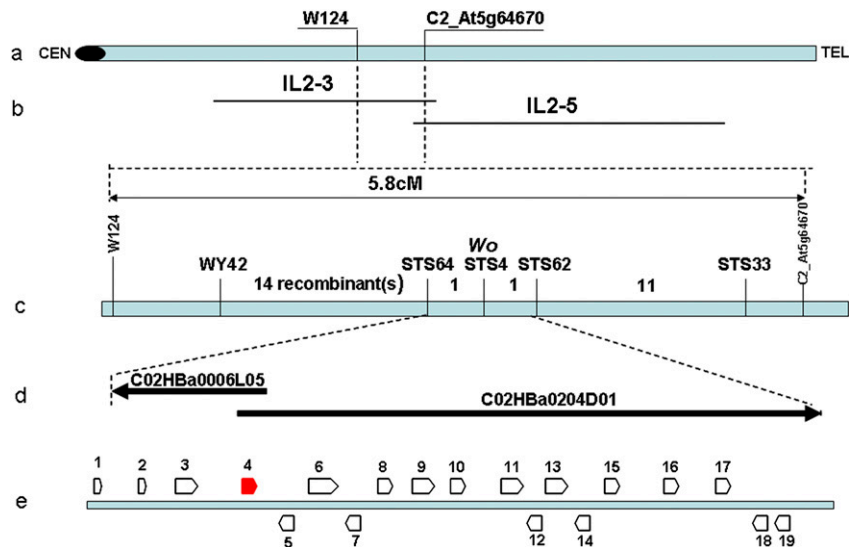

**Fig. S1.** Genetic physical map and predicted ORFs in the *Wo* region (1). It was reported that *Wo* is located near the midpoint of the long arm of chromosome 2 (2). Thus, we constructed mapping populations by crossing IL2-3 and IL2-5 with LA3186. Then, we delimited *Wo* to a 5.8-cM interval between W124 and C2\_At5g64670 by using an F<sub>2</sub> population from the cross IL2-5 × LA3186 (A). This interval was located in the introgression segment of IL2-3 (B). Therefore, we carried out fine mapping by using F<sub>2</sub> progenies from the cross IL2-3 × LA3186. *Wo* was delimited in the region between STS64 and STS62, respectively, with one recombination event (C). STS4 was cosegregated with *Wo* (C). As STS64 and STS62 were exploited based on the sequences of C02HBa0006L05 and C02HBa0204D01 separately, we tried to align these two BAC sequences. These two BACs formed an approximately 200-kb contig with 15,328-bp overlapping ends, indicating that *Wo* was located in this approximately 200-kb region (D). Gene prediction by using FGENESH (<http://softberry.com>) demonstrated that this region contains 19 putative ORFs (E). The homologues of these ORFs include copia LTR rider (*S. lycopersicum*), COBRA-LIKE PROTEIN 10 PRECURSOR (*A. thaliana*), hypothetical protein (*Populus trichocarpa*), PDF2 (ORF4) (*A. thaliana*), VPS28-2 (*A. thaliana*), and β-glucosidase (*Oryza sativa*).

1. Yang C, Li H, Zhang J, Wang T, Ye Z (2011) Bayesian functional mapping of dynamic quantitative traits. *Theor Appl Genet*, 10.1007/s00122-011-1601-0.
2. Rick CM, Butler L (1956) Cytogenetics of the tomato. *Adv Genet* 8:267–382.



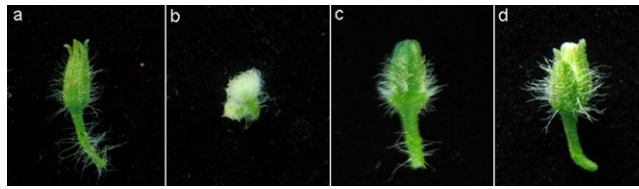

**Fig. 53.** Flower buds of negative plants (A) and transgenic lines (L1, L2, L3) overexpressing ORF4 (B–D).

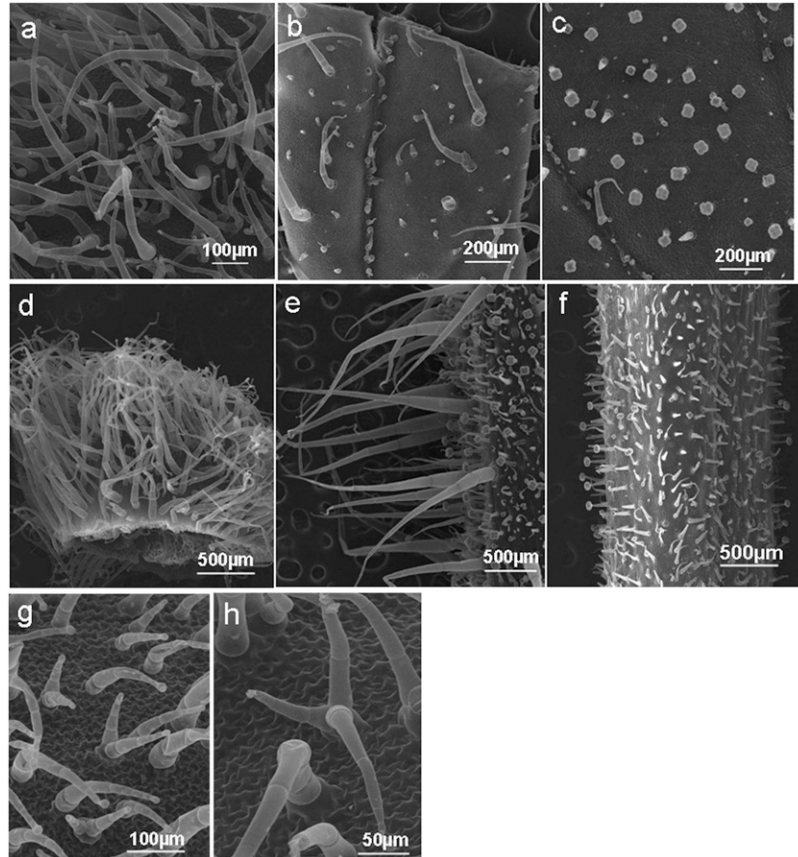

**Fig. 54.** Trichomes on the epidermis of LA3186 (A and D), its nonwoolly segregants (B and E), and RNAi transgenic plants (C and F). Clusters consist of two trichomes (G) and three trichomes (H) on LA3186.



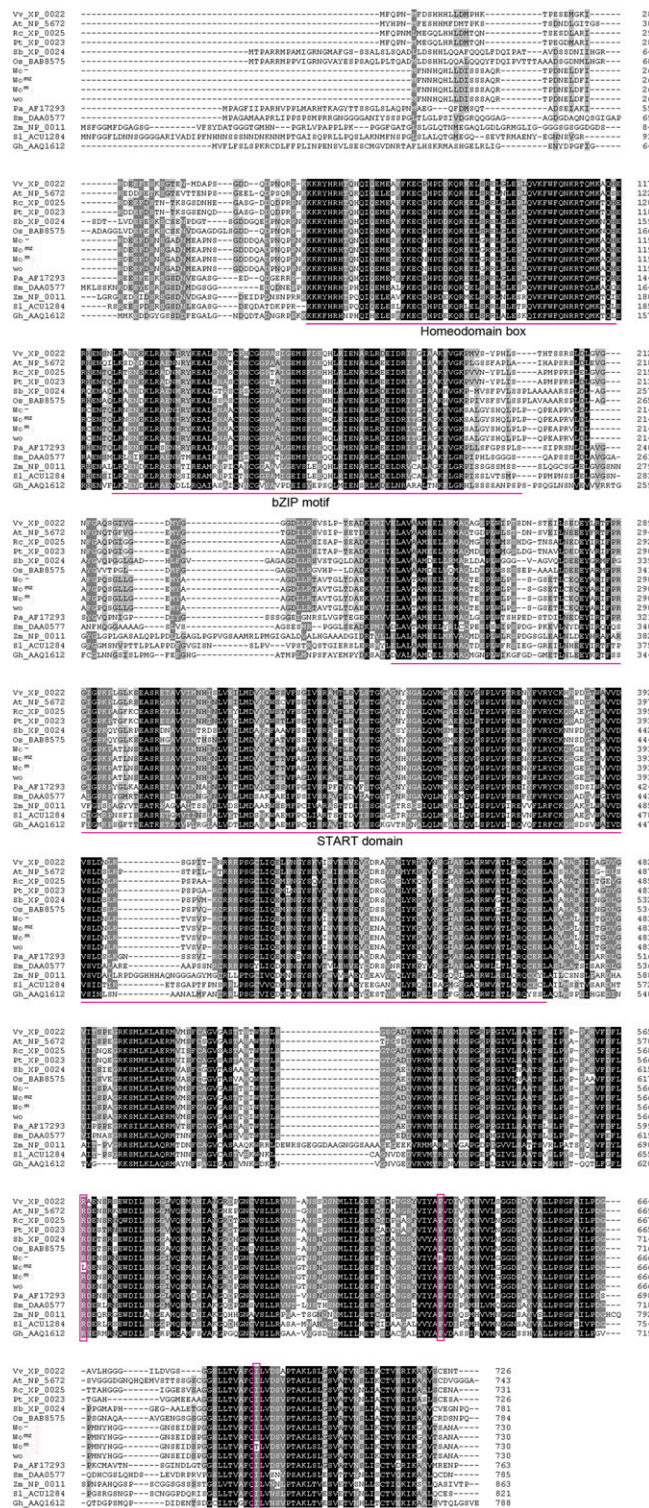

**Fig. 55.** Amino acid alignments of the predicted proteins of *Wo* alleles with 11 HD proteins from other species. Three conserved domains, a HD domain, a bZIP motif, and a START domain, are represented, respectively, by three red lines. Sites of amino acid substitution in *Wo* alleles indicated by three red rectangles are highly conserved among their homologues.





**Table S1. Wo positively regulated genes**

| Accession no. | Annotation                                           | e value   | Fold change (woolly vs. nonwoolly) |
|---------------|------------------------------------------------------|-----------|------------------------------------|
| SGN-U213590   | Pepper esterase                                      | 1.00E-140 | 15.26                              |
| SGN-U218869   | Microsomal omega-6-desaturase                        | 1.00E-156 | 6.26                               |
| SGN-U223134   | DC1 domain containing protein                        | 4.00E-109 | 5.22                               |
| SGN-U217123   | Cytochrome P450                                      | 9.00E-164 | 5.11                               |
| SGN-U214460   | Pathogenesis-related protein STH-2                   | 9.00E-83  | 5.09                               |
| SGN-U223742   | Peroxidase 72 precursor                              | 3.00E-41  | 5.04                               |
| SGN-U213891   | Peroxidase                                           | 3.00E-110 | 4.92                               |
| SGN-U215958   | Glucan endo-1,3- $\beta$ -glucosidase A              | 5.00E-185 | 4.78                               |
| SGN-U233094   | Pathogenesis-related protein P2                      | 2.00E-35  | 4.7                                |
| SGN-U216027   | KED                                                  | 5.00E-11  | 4.55                               |
| SGN-U222505   | Unnamed protein                                      | 7.00E-77  | 4.38                               |
| SGN-U215392   | Suberization-associated anionic peroxidase 1         | 4.00E-185 | 4.37                               |
| SGN-U217569   | Anionic peroxidase swpb2                             | 2.00E-92  | 4.34                               |
| SGN-U212751   | Probable GST                                         | 4.00E-59  | 4.29                               |
| SGN-U227243   | Hypothetical protein                                 | 4.00E-30  | 4.28                               |
| SGN-U226950   | B-type cyclin                                        | 2.00E-21  | 4.25                               |
| SGN-U219809   | UDP-glucose:glucosyltransferase                      | 4.00E-104 | 4.22                               |
| SGN-U232815   | Lipid desaturase-like protein                        | 3.00E-48  | 4.15                               |
| SGN-U217180   | Predicted protein                                    | 1.00E-49  | 4.12                               |
| SGN-U226089   | TCP protein                                          | 2.00E-34  | 4.1                                |
| SGN-U215639   | NtEIG-A1                                             | 4.00E-48  | 4.02                               |
| SGN-U214192   | Fatty acid desaturase                                | 1.00E-164 | 3.92                               |
| SGN-U212989   | Pathogenesis-related protein 10                      | 1.00E-74  | 3.92                               |
| SGN-U214493   | Peroxidase                                           | 2.00E-155 | 3.82                               |
| SGN-U221367   | Hypothetical protein                                 | 2.00E-12  | 3.75                               |
| SGN-U213641   | Lipid transfer protein LTP1 precursor                | 7.00E-51  | 3.71                               |
| SGN-U242427   | MYB60                                                | 3.00E-42  | 3.69                               |
| SGN-U222533   | Hypothetical protei                                  | 2.00E-33  | 3.6                                |
| SGN-U216630   | Hypothetical protein                                 | 8.00E-74  | 3.59                               |
| SGN-U213101   | Abscisic stress-ripening protein 1                   | 4.00E-11  | 3.58                               |
| SGN-U216491   | Putative membrane protein                            | 2.00E-212 | 3.58                               |
| SGN-U222539   | Leucine-rich repeat protein                          | 4.00E-88  | 3.55                               |
| SGN-U214985   | Pathogenesis-related protein P2                      | 4.00E-82  | 3.54                               |
| SGN-U231227   | Predicted protein                                    | 2.00E-58  | 3.51                               |
| SGN-U214902   | Class IV chitinase                                   | 3.00E-136 | 3.5                                |
| SGN-U231098   | CYP98A33v1                                           | 3.00E-85  | 3.47                               |
| SGN-U214186   | Myo-inositol oxygenase                               | 2.00E-178 | 3.47                               |
| SGN-U216964   | Sn-1                                                 | 5.00E-49  | 3.42                               |
| SGN-U221372   | White-brown-complex ABC transporter family           | 7.00E-52  | 3.39                               |
| SGN-U220637   | MYB12                                                | 6.00E-101 | 3.35                               |
| SGN-U212747   | Probable GST                                         | 7.00E-105 | 3.33                               |
| SGN-U222800   | Hypothetical protein                                 | 2.00E-78  | 3.32                               |
| SGN-U212990   | Pathogenesis-related protein STH-2                   | 1.00E-85  | 3.26                               |
| SGN-U214241   | Predicted protein                                    | 2.00E-53  | 3.25                               |
| SGN-U212783   | Lipoxygenase                                         | 0         | 3.23                               |
| SGN-U212850   | Peroxidase                                           | 3.00E-136 | 3.21                               |
| SGN-U214304   | Ethylene-responsive late embryogenesis-like protein  | 5.00E-48  | 3.2                                |
| SGN-U221457   | Peroxidase                                           | 2.00E-159 | 3.2                                |
| SGN-U235070   | Putative ROX1                                        | 1.00E-30  | 3.17                               |
| SGN-U216010   | Alkaline alpha-galactosidase seed imbibition protein | 0         | 3.16                               |
| SGN-U213299   | Hypothetical protein                                 | 1.00E-120 | 3.1                                |
| SGN-U236390   | Unnamed protein                                      | 4.00E-22  | 3.05                               |
| SGN-U219794   | Unnamed protein                                      | 1.00E-117 | 3.03                               |
| SGN-U214672   | Hypothetical protein                                 | 5.00E-200 | 3.01                               |
| SGN-U216420   | Putative nonspecific lipid transfer protein StnsLTP  | 2.00E-52  | 2.97                               |
| SGN-U223970   | Predicted protein                                    | 2.00E-83  | 2.94                               |
| SGN-U226166   | GST                                                  | 2.00E-37  | 2.93                               |
| SGN-U215098   | Unnamed protein product                              | 3.00E-232 | 2.92                               |
| SGN-U213104   | ASR4                                                 | 2.00E-91  | 2.91                               |
| SGN-U218860   | Auxin-regulated dual specificity cytosolic kinase    | 3.00E-186 | 2.91                               |
| SGN-U217904   | Chitinase, class II                                  | 3.00E-135 | 2.9                                |
| SGN-U219528   | Phosphate transporter 3                              | 6.00E-24  | 2.88                               |
| SGN-U214961   | Flavonol synthase                                    | 2.00E-174 | 2.84                               |



Table S1. Cont.

| Accession no. | Annotation                                                                               | e value   | Fold change (woolly vs. nonwoolly) |
|---------------|------------------------------------------------------------------------------------------|-----------|------------------------------------|
| SGN-U226297   | Alkaline $\alpha$ -galactosidase seed imbibition protein                                 | 2.00E-109 | 2.82                               |
| SGN-U215001   | BURP domain-containing protein                                                           | 2.00E-157 | 2.78                               |
| SGN-U215393   | Suberization-associated anionic peroxidase 2                                             | 1.00E-174 | 2.76                               |
| SGN-U223748   | 2-Hydroxyisoflavanone dehydratase                                                        | 2.00E-71  | 2.73                               |
| SGN-U220694   | Hypothetical protein                                                                     | 1.00E-151 | 2.71                               |
| SGN-U213790   | Acidic 26 kDa endochitinase                                                              | 8.00E-149 | 2.7                                |
| SGN-U227536   | Predicted protein                                                                        | 4.00E-11  | 2.69                               |
| SGN-U226247   | Unknown                                                                                  | 3.00E-24  | 2.68                               |
| SGN-U222218   | Nonspecific lipid-transfer protein 2                                                     | 3.00E-38  | 2.67                               |
| SGN-U215088   | MtN19-like protein                                                                       | 1.00E-158 | 2.64                               |
| SGN-U217302   | Glycine-rich protein                                                                     | 5.00E-06  | 2.62                               |
| SGN-U213541   | Cationic peroxidase                                                                      | 2.00E-165 | 2.62                               |
| SGN-U226141   | Heat shock factor protein                                                                | 4.00E-12  | 2.61                               |
| SGN-U214090   | Caffeoyl-CoA O-methyltransferase                                                         | 2.00E-135 | 2.61                               |
| SGN-U215231   | Cell wall peroxidase                                                                     | 9.00E-161 | 2.59                               |
| SGN-U216828   | HAT22                                                                                    | 1.00E-49  | 2.56                               |
| SGN-U223342   | Hypothetical protein                                                                     | 9.00E-68  | 2.55                               |
| SGN-U226976   | Ubiquitin-conjugating enzyme                                                             | 1.00E-75  | 2.54                               |
| SGN-U216827   | Phytophthora-inhibited protease 1                                                        | 7.00E-194 | 2.51                               |
| SGN-U223775   | Hypothetical protein                                                                     | 1.00E-109 | 2.5                                |
| SGN-U218425   | Hypothetical protein                                                                     | 4.00E-23  | 2.47                               |
| SGN-U233542   | Nonspecific lipid transfer protein StnsLTP                                               | 7.00E-19  | 2.47                               |
| SGN-U223651   | Hypothetical protein                                                                     | 1.00E-118 | 2.45                               |
| SGN-U217224   | Protein SSM1                                                                             | 1.00E-93  | 2.44                               |
| SGN-U212775   | Pectate lyase                                                                            | 1.00E-196 | 2.43                               |
| SGN-U214145   | Hypothetical protein                                                                     | 5.00E-103 | 2.43                               |
| SGN-U219224   | Hypothetical protein                                                                     | 2.00E-170 | 2.43                               |
| SGN-U219786   | WRKY-type DNA binding protein                                                            | 5.00E-83  | 2.42                               |
| SGN-U242588   | Conserved hypothetical protein                                                           | 1.00E-54  | 2.41                               |
| SGN-U214242   | Hypothetical protein                                                                     | 2.00E-129 | 2.4                                |
| SGN-U240637   | Nam-like protein 11                                                                      | 1.00E-21  | 2.39                               |
| SGN-U214663   | Subtilisin-like protease                                                                 | 2.00E-173 | 2.37                               |
| SGN-U223262   | Ring domain containing protein isoform 2                                                 | 6.00E-32  | 2.37                               |
| SGN-U230206   | Predicted protein                                                                        | 7.00E-83  | 2.36                               |
| SGN-U223136   | Actin-100                                                                                | 1.00E-110 | 2.35                               |
| SGN-U218395   | Unnamed protein product                                                                  | 2.00E-65  | 2.34                               |
| SGN-U212753   | GST-like protein                                                                         | 2.00E-123 | 2.3                                |
| SGN-U219778   | Protein binding protein                                                                  | 1.00E-42  | 2.29                               |
| SGN-U213103   | ASR4                                                                                     | 6.00E-100 | 2.27                               |
| SGN-U216860   | Conserved hypothetical protein                                                           | 3.00E-23  | 2.26                               |
| SGN-U217364   | Hypothetical protein                                                                     | 1.00E-61  | 2.26                               |
| SGN-U212754   | GST                                                                                      | 3.00E-85  | 2.26                               |
| SGN-U232526   | Peroxidase cevi16                                                                        | 3.00E-67  | 2.25                               |
| SGN-U214945   | Serine acetyltransferase                                                                 | 1.00E-161 | 2.24                               |
| SGN-U215860   | Xyloglucan endotransglucosylase-hydrolase XTH6                                           | 2.00E-147 | 2.24                               |
| SGN-U215369   | Predicted protein                                                                        | 6.00E-105 | 2.23                               |
| SGN-U215219   | CYP92B3                                                                                  | 4.00E-184 | 2.23                               |
| SGN-U214088   | Caffeoyl-CoA O-methyltransferase                                                         | 7.00E-135 | 2.22                               |
| SGN-U213377   | Dicyanin                                                                                 | 1.00E-28  | 2.2                                |
| SGN-U212752   | Probable GST                                                                             | 8.00E-84  | 2.18                               |
| SGN-U216984   | Arabinogalactan-protein                                                                  | 5.00E-14  | 2.18                               |
| SGN-U215123   | WRKY protein                                                                             | 8.00E-255 | 2.17                               |
| SGN-U217650   | Myb-related protein                                                                      | 1.00E-68  | 2.17                               |
| SGN-U217525   | Predicted protein                                                                        | 8.00E-112 | 2.17                               |
| SGN-U213200   | <i>N</i> -hydroxycinnamoyl-CoA:tyramine<br><i>N</i> -hydroxycinnamoyl transferase THT1-3 | 5.00E-132 | 2.17                               |
| SGN-U225036   | Hypothetical protein                                                                     | 9.00E-51  | 2.16                               |
| SGN-U215122   | Transcription factor WRKY                                                                | 1.00E-131 | 2.16                               |
| SGN-U215220   | CYP92B2v1                                                                                | 1.00E-80  | 2.16                               |
| SGN-U215329   | Hypothetical protein                                                                     | 4.00E-79  | 2.15                               |
| SGN-U212799   | 1-aminocyclopropane-1-carboxylate oxidase homolog                                        | 5.00E-97  | 2.15                               |
| SGN-U213099   | Abscisic stress-ripening protein 3                                                       | 3.00E-34  | 2.15                               |



**Table S1. Cont.**

| Accession no. | Annotation                             | e value   | Fold change (woolly vs. nonwoolly) |
|---------------|----------------------------------------|-----------|------------------------------------|
| SGN-U219448   | Predicted protein                      | 4.00E-72  | 2.14                               |
| SGN-U215689   | Hypothetical protein                   | 6.00E-33  | 2.13                               |
| SGN-U217841   | UDP-glucose:glucosyltransferase        | 2.00E-48  | 2.12                               |
| SGN-U242267   | Metal transporter                      | 1.00E-67  | 2.12                               |
| SGN-U213376   | Dicyanin                               | 3.00E-130 | 2.12                               |
| SGN-U213688   | Hypothetical protein                   | 5.00E-26  | 2.11                               |
| SGN-U216552   | Hypothetical protein                   | 2.00E-43  | 2.11                               |
| SGN-U215524   | Avr9/Cf-9 rapidly elicited protein 216 | 1.00E-100 | 2.11                               |
| SGN-U220541   | Unnamed protein                        | 2.00E-113 | 2.11                               |
| SGN-U215204   | CER6                                   | 3.00E-287 | 2.09                               |
| SGN-U215387   | Metal ion binding protein              | 2.00E-47  | 2.09                               |
| SGN-U213895   | Early light inducible protein          | 2.00E-58  | 2.09                               |
| SGN-U216640   | Predicted protein                      | 2.00E-259 | 2.09                               |
| SGN-U215688   | Hypothetical protein                   | 1.00E-106 | 2.07                               |
| SGN-U222710   | Unknown                                | 6.00E-15  | 2.07                               |
| SGN-U235018   | Ubiquitin-conjugating enzyme           | 2.00E-23  | 2.07                               |
| SGN-U226863   | Hypothetical protein                   | 2.00E-50  | 2.06                               |
| SGN-U226730   | AP2 (APETALA 2)                        | 2.00E-10  | 2.06                               |
| SGN-U219896   | CYP72A54                               | 1.00E-183 | 2.04                               |
| SGN-U222665   | Receptor-like protein kinase           | 5.00E-47  | 2.03                               |
| SGN-U213391   | Predicted protein                      | 2.00E-39  | 2.03                               |
| SGN-U216631   | NAC domain protein                     | 9.00E-07  | 2.03                               |
| SGN-U214773   | Peroxisomal membrane protein pmp34     | 7.00E-116 | 2.02                               |
| SGN-U216383   | Wound-induced protein 1                | 6.00E-51  | 2.01                               |
| SGN-U233379   | ABA-induced MYB transcription factor   | 6.00E-75  | 2.01                               |
| SGN-U216869   | Predicted protein                      | 1.00E-92  | 2.01                               |
| SGN-U215161   | Auxin-regulated protein                | 5.00E-223 | 2                                  |
| SGN-U223447   | DNA binding protein                    | 1.00E-49  | 2                                  |
| SGN-U215935   | NAD(P)H:quinone oxidoreductase         | 3.00E-85  | 2                                  |
| SGN-U222613   | Predicted protein                      | 7.00E-75  | 2                                  |
| SGN-U217320   | Unknown                                | 2.00E-25  | 2                                  |

**Table S2. Primers used for function and expression analysis of *Wo* and *SlCycB2***

| Name                                                            | Forward primer (5'-3')            | Reverse primer (5'-3')           |
|-----------------------------------------------------------------|-----------------------------------|----------------------------------|
| Full-length <i>Wo</i> cDNA                                      | TTCAAGATGTTTAATAACCACCAGC         | ACCTTTCATGCATTGCGGAAGTTAC        |
| Full-length <i>Wo</i> gDNA                                      | AAATCATAAACATGGGCGTTT             | TGGGATAAAGGAAGTAAACACA           |
| Full-length <i>Wo</i> for subcellular localization              | GCGTCGACTTCAAGATGTTTAATAACCACCAGC | GCGTCGACACCTTTCATGCATTGCGGATAC   |
| Full-length <i>Wo</i> for BiFC                                  | GCGGATCCATGTTTAATAACCACCAGCACTTG  | GCGGTACCGAGTGCATTGCGGAAGTTAC     |
| <i>Wo</i> for RT-PCR                                            | TGGAGAAATGTACGCTGCTG              | TTGCAATGCTCCATTGTGAT             |
| <i>Wo</i> promoter for GFP analysis                             | GCGCGCCGCCATCCTATTAGCCATAAGTGTGA  | GCCTCGAGAATACCTTCTCGATCTTCTCAAAA |
| Fragment of <i>Wo</i> for RNAi vector and in situ hybridization | AATGGTGGGATTGTTCAGGA              | TGCATTGCGGAAGTTACAG              |
| Full-length <i>SlCycB2</i> cDNA                                 | ATGAGCAGGAGAAATGGAAATG            | TTATTTTTTCTCATAGATAACTTCA        |
| Full-length <i>SlCycB2</i> for BiFC                             | GCGGATCCATGAGCAGGAGAAATGGAAATG    | GCGGTACCGCGTTTTTCTCATAGATAACTTCA |
| <i>SlCycB2</i> for RT-PCR                                       | AAACCCCTCACTTCCGATCT              | GCCCTATAGAAGTCCAAAATTC           |
| <i>SlCycB2</i> for real-time PCR                                | TGAGCAGGAGAAATGGAA                | CATTGTCAGCGACCTTGT               |
| Fragment of <i>SlCycB2</i> for RNAi vector                      | AATGAGCAGGAGAAATGGAAA             | GGGCGGTGATATTGATAAACC            |
| <i>NPTII</i>                                                    | AGACAATCGGCTGCTCTGAT              | TCATTTGAAACCCAGAGTC              |
| <i>Actin</i> for RT-PCR                                         | ATGGCAGACGGAGAGGATATTCA           | GCCTTGGCAATCCACATCTGCTG          |
| <i>Actin</i> for real-time PCR                                  | GTCCTCTCCAGCCATCCAT               | ACCACTGAGCACAATGTTACCG           |
